# Supplementary material for: Netrin-1 blockade inhibits tumour growth and EMT features in endometrial cancer
Source: PubMed Central journal article supplement (PMC10412451; doi:10.1038/s41586-023-06367-z), 2023-08-02
Supplement: 41586_2023_6367_MOESM1_ESM.pdf [file 41586_2023_6367_MOESM1_ESM.pdf]

---

**Supplementary information**

---

**Netrin-1 blockade inhibits tumour growth and EMT features in endometrial cancer**

---

In the format provided by the authors and unedited

---

**Supplementary information**

---

**Netrin-1 blockade inhibits tumour growth and EMT features in endometrial cancer**

---

In the format provided by the authors and unedited

**Table 1a** - Clinical data from EC retrospective cohort analysis

| Patient ID | T/N     | Age at diagnosis | Histological type    | Grade         | Stage         |
|------------|---------|------------------|----------------------|---------------|---------------|
| ENDO-04    | Tumoral | 84               | Endometrioid         | 1             | Ib            |
| ENDO-07    | Tumoral | 50               | Endometrioid         | 1             | Ia            |
| ENDO-12    | Tumoral | 56               | Endometrioid         | 1             | Ia            |
| ENDO-16    | Tumoral | 82               | Endometrioid         | 1             | Ia (T1aN0)    |
| ENDO-18    | Tumoral | 67               | Endometrioid         | 1             | Ia (T1aN0)    |
| ENDO-24    | Tumoral | 63               | Endometrioid         | 1             | Ia (T1aN0)    |
| ENDO-25    | Tumoral | 61               | Endometrioid         | 1             | Ia (T1aN0)    |
| ENDO-26    | Tumoral | 35               | Endometrioid         | 1             | Ia (T1aN0)    |
| ENDO-30    | Tumoral | 62               | Endometrioid         | 1             | Ib (T1bN0)    |
| ENDO-35    | Tumoral | 79               | Endometrioid         | 1             | Ia (T1aNx)    |
| ENDO-36    | Tumoral | 79               | Endometrioid         | 1             | Ib (T1bN0)    |
| ENDO-38    | Tumoral | 43               | Endometrioid         | 1             | Ia (T1aNx)    |
| ENDO-40    | Tumoral | 63               | Endometrioid         | 1             | Ib (T1bN0)    |
| ENDO-41    | Tumoral | 80               | Endometrioid         | 1             | Ib (T1bN0)    |
| ENDO-48    | Tumoral | 66               | Endometrioid         | 1             | Ia (T1aN0)    |
| ENDO-63    | Tumoral | 68               | Endometrioid         | 1             | T3a N0        |
| ENDO-64    | Tumoral | 64               | Endometrioid         | 1             | T1a Nx        |
| ENDO-65    | Tumoral | 56               | Endometrioid         | 1             | T1a N0        |
| ENDO-06    | Tumoral | 72               | Endometrioid         | 2             | II (T2N0)     |
| ENDO-08    | Tumoral | 66               | Endometrioid         | 2             | Ib            |
| ENDO-09    | Tumoral | 58               | Endometrioid         | 2             | Ia            |
| ENDO-14    | Tumoral | 57               | Endometrioid         | 2             | Ib            |
| ENDO-15    | Tumoral | 71               | Endometrioid         | 2             | Ib (T1bN0)    |
| ENDO-17    | Tumoral | 71               | Endometrioid         | 2             | Ia (T1aNx)    |
| ENDO-22    | Tumoral | 61               | Endometrioid         | 2             | IIIc (T1bN1)  |
| ENDO-23    | Tumoral | 71               | Endometrioid         | 2             | Ib (T1bN0)    |
| ENDO-27    | Tumoral | 61               | Endometrioid         | 2             | Ia (T1aN0)    |
| ENDO-29    | Tumoral | 74               | Endometrioid         | 2             | IIIc (T1bN1)  |
| ENDO-34    | Tumoral | 71               | Endometrioid         | 2             | IIIc (T2N1)   |
| ENDO-39    | Tumoral | 84               | Endometrioid         | 2             | Ib (T1bNx)    |
| ENDO-43    | Tumoral | 86               | Endometrioid         | 2             | Ia (T1aNx)    |
| ENDO-46    | Tumoral | 69               | Endometrioid         | 2             | Ib (T1bNx)    |
| ENDO-49    | Tumoral | 72               | Endometrioid         | 2             | Ia(T1aNx)     |
| ENDO-50    | Tumoral | 73               | Endometrioid         | 2             | Ib (T1bN0)    |
| ENDO-51    | Tumoral | 52               | Endometrioid         | 2             | Ia (T1aN0)    |
| ENDO-58    | Tumoral | 71               | Endometrioid         | 2             | IIIc (T2N1)   |
| ENDO-60    | Tumoral | 52               | Endometrioid         | 2             | IIIa (T3aN0)  |
| ENDO-67    | Tumoral | 68               | Endometrioid         | 2             | T1a N0        |
| ENDO-56    | Tumoral | 75               | Carcinosarcoma       | 3             | Ia (T1aNx)    |
| ENDO-03    | Tumoral | 80               | CCC                  | 3             | IIIc (T3aN1)  |
| ENDO-05    | Tumoral | 71               | Endometrioid         | 3             | Ib            |
| ENDO-11    | Tumoral | 60               | Endometrioid         | 3             | Ia            |
| ENDO-13    | Tumoral | 59               | Endometrioid         | 3             | IIIc (T1bN1)  |
| ENDO-32    | Tumoral | 81               | Endometrioid         | 3             | Ib (T1bNx)    |
| ENDO-33    | Tumoral | 66               | Endometrioid         | 3             | Ib (T1bN0)    |
| ENDO-44    | Tumoral | 88               | Endometrioid         | 3             | II (T2Nx)     |
| ENDO-45    | Tumoral | 60               | Endometrioid         | 3             | IB (T1bN0)    |
| ENDO-59    | Tumoral | 91               | Endometrioid         | 3             | IIIc (T3bN1)  |
| ENDO-66    | Tumoral | 55               | Endometrioid         | 3             | T1b N0        |
| ENDO-69    | Tumoral | 73               | Endometrioid         | 3             | T1a N0        |
| ENDO-70    | Tumoral | 89               | Endometrioid         | 3             | T1a Nx        |
| ENDO-71    | Tumoral | 47               | Endometrioid         | 3             | T2N0          |
| ENDO-72    | Tumoral | 68               | Endometrioid         | 3             | T1a N0        |
| ENDO-01    | Tumoral | 72               | UPSC                 | 3             | IIIc (T2aN1)  |
| ENDO-02    | Tumoral | 72               | UPSC                 | 3             | IIIa (T3aN0)  |
| ENDO-31    | Tumoral | 81               | UPSC                 | 3             | Ia (T1aNx)    |
| ENDO-37    | Tumoral | 81               | UPSC                 | 3             | T1bNx         |
| ENDO-47    | Tumoral | 82               | UPSC                 | 3             | IIIa (T3aNx)  |
| ENDO-57    | Tumoral | 68               | UPSC                 | 3             | IIIc (T2N2)   |
| ENDO-62    | Tumoral | 75               | UPSC                 | 3             | 1a (T1aN0)    |
| ENDO-68    | Tumoral | 62               | UPSC                 | 3             | T1a N0        |
| ENDO-10    | Tumoral | 53               | Endometrioide + UPSC | 1 +3          | IIIc (T1aN1)  |
| ENDO-42    | Tumoral | 74               | Endometrioide + UPSC | 2+3           | Ib (T1bN0)    |
| ENDO-28    | Tumoral | 69               | Endometrioide + UPSC | 3+3           | Ivb (T3aNxM1) |
| ENDO-76    | Normal  | 65               |                      | atrophia      |               |
| ENDO-75    | Normal  | 53               |                      | hypotrophia   |               |
| ENDO-73    | Normal  | 47               |                      | proliferative |               |
| ENDO-74    | Normal  | 43               |                      | proliferative |               |
| ENDO-77    | Normal  | 44               |                      | proliferative |               |
| ENDO-78    | Normal  | 50               |                      | proliferative |               |
| ENDO-79    | Normal  | 41               |                      | proliferative |               |
| ENDO-80    | Normal  | 45               |                      | proliferative |               |

**Table 1b** - Clinical data and translational analysis from 14 patients with EC treated in the Phase I clinical trial

| Patient ID | Dose of NP137 (mg/Kg) | Age at the Inclusion | Histologic Type           | Grade at initial diagnosis | Stade (AJCC) | Bulk RNAseq | IHC EpCAM | Multiplex IHC PanCK/Vim | scRNAseq/ 10x Visium |
|------------|-----------------------|----------------------|---------------------------|----------------------------|--------------|-------------|-----------|-------------------------|----------------------|
| 1-024      | 14                    | 44                   | Endometrioid ADK          | 2                          | IVB          | x           |           |                         |                      |
| 1-028      | 20                    | 73                   | Papillary serous ADK      | 3                          | IVB          | x           | x         |                         |                      |
| 1-030      | 14                    | 69                   | Endometrioid ADK          | 2                          | IVB          | x           | x         | x                       |                      |
| 1-032      | 14                    | 79                   | Endometrioid ADK          | 2                          | IVB          | x           |           |                         |                      |
| 1-034      | 14                    | 48                   | Endometrioid ADK          | 2                          | NA           | x           | x         | x                       | x                    |
| 1-035      | 14                    | 66                   | Serous ADK                | 3                          | NA           |             | x         |                         |                      |
| 1-039      | 14                    | 80                   | Papillary serous ADK      | 3                          | NA           | x           | x         | x                       | x                    |
| 1-040      | 14                    | 70                   | Endometrioid ADK          | 2                          | NA           | x           | x         | x                       | x                    |
| 2-004      | 14                    | 74                   | Endometrioid ADK          | 2                          | IV           | No biopsy   |           |                         |                      |
| 2-012      | 20                    | 79                   | Endometrioid ADK          | 1                          | IV           | x           |           |                         |                      |
| 2-013      | 20                    | 66                   | Papillary serous ADK      | 3                          | IV           | x           |           |                         |                      |
| 2-014      | 14                    | 65                   | Endometrioid ADK          | 2                          | IV           | x           |           |                         |                      |
| 2-015      | 14                    | 65                   | Endometrioid ADK          | 2                          | IVB          | x           |           |                         |                      |
| 2-020      | 14                    | 61                   | Poorly differentiated ADK | 3                          | NA           | x           |           |                         |                      |

**Table 1c** - Baseline characteristics from 14 patients with EC treated in the Phase I clinical trial

| <b>Age at inclusion</b> |                  |
|-------------------------|------------------|
| Median, years [min-max] | 68.3 [44.7-80.6] |

| <b>PS ECOG at inclusion, n (%)</b> |           |
|------------------------------------|-----------|
| 0                                  | 5 (35.7%) |
| 1                                  | 9 (64.3%) |

| <b>AJCC Stage, n (%)</b> |           |
|--------------------------|-----------|
| IV                       | 14 (100%) |

|                                 |            |
|---------------------------------|------------|
| <b>Surgery of primary tumor</b> | 13 (92.3%) |
|---------------------------------|------------|

|                                      |            |
|--------------------------------------|------------|
| <b>Radiotherapy of primary tumor</b> | 10 (71.4%) |
|--------------------------------------|------------|

| <b>Prior systemic treatment</b> |                 |
|---------------------------------|-----------------|
| Median [min-max]                | 3.0 [2.0 - 6.0] |
| 2-3L, n (%)                     | 9 (64.3%)       |
| >3L, n (%)                      | 5 (35.7%)       |

| <b>Metastatic site at inclusion</b> |                 |
|-------------------------------------|-----------------|
| Median [min-max]                    | 2.0 [1.0 - 5.0] |

| <b>Main metastatic sites, N (%)</b> |           |
|-------------------------------------|-----------|
| Lymph node                          | 8 (57.1%) |
| Lung                                | 8 (57.1%) |
| Liver                               | 6 (42.9%) |

### **Supplementary Table 1.**

Table presenting clinical characteristics of patients analyzed in the scope of this manuscript. **a**, details on patients of the cohort of 72 human endometrial tumors used to monitor netrin-1/UNC5B expression. **b**, Patients with endometrial adenocarcinoma included in the NP137 trial from whom we described clinical data and from whom biopsies were collected for either bulk RNAseq, EpCAM IHC, multiplex IHC PanCytokeratin and Vimentin or scRNAseq/Visium. Due to material availability, not all the techniques could be performed for all patients. **c**, Patient's baseline clinical characteristics before inclusion in the NP137 trial.
