# Supplementary material for: Netrin-1 blockade inhibits tumour growth and EMT features in endometrial cancer
Source: PubMed Central journal article supplement (PMC10412451; doi:10.1038/s41586-023-06367-z), 2023-08-02
Supplement: 41586_2023_6367_MOESM2_ESM.pdf [file 41586_2023_6367_MOESM2_ESM.pdf]

## Reporting Summary

Nature Portfolio wishes to improve the reproducibility of the work that we publish. This form provides structure for consistency and transparency in reporting. For further information on Nature Portfolio policies, see our [Editorial Policies](#) and the [Editorial Policy Checklist](#).

### Statistics

For all statistical analyses, confirm that the following items are present in the figure legend, table legend, main text, or Methods section.

n/a Confirmed

- The exact sample size ( $n$ ) for each experimental group/condition, given as a discrete number and unit of measurement
- A statement on whether measurements were taken from distinct samples or whether the same sample was measured repeatedly
- The statistical test(s) used AND whether they are one- or two-sided  
*Only common tests should be described solely by name; describe more complex techniques in the Methods section.*
- A description of all covariates tested
- A description of any assumptions or corrections, such as tests of normality and adjustment for multiple comparisons
- A full description of the statistical parameters including central tendency (e.g. means) or other basic estimates (e.g. regression coefficient) AND variation (e.g. standard deviation) or associated estimates of uncertainty (e.g. confidence intervals)
- For null hypothesis testing, the test statistic (e.g.  $F$ ,  $t$ ,  $r$ ) with confidence intervals, effect sizes, degrees of freedom and  $P$  value noted  
*Give  $P$  values as exact values whenever suitable.*
- For Bayesian analysis, information on the choice of priors and Markov chain Monte Carlo settings
- For hierarchical and complex designs, identification of the appropriate level for tests and full reporting of outcomes
- Estimates of effect sizes (e.g. Cohen's  $d$ , Pearson's  $r$ ), indicating how they were calculated

*Our web collection on [statistics for biologists](#) contains articles on many of the points above.*

### Software and code

Policy information about [availability of computer code](#)

Data collection

NA

Data analysis

For the RNAseq, we used a classical pipeline, alignment and mapping with the STAR software (v2.5.2b), the analysis was performed with the DeSEQ2 package (ver 1.30.1) with the R software (ver4.0.3).  
Concerning the single cell RNAseq analysis Spatial transcriptomic, we used a classical pipeline, Cell Ranger (ver6.1.1) or Space Ranger v2.0 to generate the counting matrices and performed the analysis with Seurat(ver4.1.1) on R software (Ver4.2.0). During the analysis, we used DoubletFinder (ver2.0.3), several annotations packages (SciBet v.1.0, SingleR v.1.10.0, scType, ProjecTILs ver.3.0.3, CellTypist v.1.3.0), UCell ver2.2.0, AUCell v.1.18.1, escape package v.1.6.0, Nebulosa ver.1.6.0, Scillus' ver0.5.0, ggplot2 v.3.3.6. For cell communication, we used cellchat v.1.6.0.

For manuscripts utilizing custom algorithms or software that are central to the research but not yet described in published literature, software must be made available to editors and reviewers. We strongly encourage code deposition in a community repository (e.g. GitHub). See the Nature Portfolio [guidelines for submitting code & software](#) for further information.

### Data

Policy information about [availability of data](#)

All manuscripts must include a [data availability statement](#). This statement should provide the following information, where applicable:

- Accession codes, unique identifiers, or web links for publicly available datasets
- A description of any restrictions on data availability
- For clinical datasets or third party data, please ensure that the statement adheres to our [policy](#)

We are currently in the process of depositing the data on the GEOdataset. We do not have an accession number yet.

## Field-specific reporting

Please select the one below that is the best fit for your research. If you are not sure, read the appropriate sections before making your selection.

Life sciences       Behavioural & social sciences       Ecological, evolutionary & environmental sciences

For a reference copy of the document with all sections, see [nature.com/documents/nr-reporting-summary-flat.pdf](https://www.nature.com/documents/nr-reporting-summary-flat.pdf)

## Life sciences study design

All studies must disclose on these points even when the disclosure is negative.

|                 |                                                                                                                                                                                                                                                                                                                                                                                                                                                                                                                                                                    |
|-----------------|--------------------------------------------------------------------------------------------------------------------------------------------------------------------------------------------------------------------------------------------------------------------------------------------------------------------------------------------------------------------------------------------------------------------------------------------------------------------------------------------------------------------------------------------------------------------|
| Sample size     | In the dose escalation part: it was planned to enroll a maximum of 30 patients in 7 dose level (DL) cohorts and a maximum of 24 patients in biological cohort starting at DL4. In each extension cohorts, it was planned to enroll 14 patients.<br>No sample size calculation were performed in the preclinical part of the study. Sample sizes were determined according to the standards of publication in the respective models of preclinical research. Concerning clinical data, sample size directly belonged to patient inclusions and sample availability. |
| Data exclusions | No data exclusion had to be done.                                                                                                                                                                                                                                                                                                                                                                                                                                                                                                                                  |
| Replication     | No troubles in experiment replication have to be declared. All the replicates are included in the manuscript.                                                                                                                                                                                                                                                                                                                                                                                                                                                      |
| Randomization   | Randomization was performed for all animal experiments. In PTEN mouse experiments, mice were randomly attributed to the different groups of treatment without specific criterias. In xenograft experiments, around 100mm <sup>3</sup> of tumor volume, mice were allocated to the different groups by minimizing the difference in mean volume and SEM.                                                                                                                                                                                                            |
| Blinding        | Pathological samples analysis were conducted in blind for tumor complexity assesment or cleaved caspase-3 IHC quantifications.                                                                                                                                                                                                                                                                                                                                                                                                                                     |

## Reporting for specific materials, systems and methods

We require information from authors about some types of materials, experimental systems and methods used in many studies. Here, indicate whether each material, system or method listed is relevant to your study. If you are not sure if a list item applies to your research, read the appropriate section before selecting a response.

### Materials & experimental systems

### Methods

| n/a                      | Involved in the study                                           | n/a                      | Involved in the study                           |
|--------------------------|-----------------------------------------------------------------|--------------------------|-------------------------------------------------|
| <input type="checkbox"/> | <input checked="" type="checkbox"/> Antibodies                  | <input type="checkbox"/> | <input type="checkbox"/> ChIP-seq               |
| <input type="checkbox"/> | <input checked="" type="checkbox"/> Eukaryotic cell lines       | <input type="checkbox"/> | <input type="checkbox"/> Flow cytometry         |
| <input type="checkbox"/> | <input type="checkbox"/> Palaeontology and archaeology          | <input type="checkbox"/> | <input type="checkbox"/> MRI-based neuroimaging |
| <input type="checkbox"/> | <input checked="" type="checkbox"/> Animals and other organisms |                          |                                                 |
| <input type="checkbox"/> | <input checked="" type="checkbox"/> Human research participants |                          |                                                 |
| <input type="checkbox"/> | <input checked="" type="checkbox"/> Clinical data               |                          |                                                 |
| <input type="checkbox"/> | <input type="checkbox"/> Dual use research of concern           |                          |                                                 |

## Antibodies

Antibodies used

anti-Unc5B, used for IHC, clone D9M72, Cell Signaling Technologies, ref.#13851S, batch 1.  
anti-Ntn1, used for IHC, Cohesion Biosciences, ref.#CPA2389.  
anti-Cleaved Caspase 3, used for IHC, Cell Signaling Technologies, ref.#9661, batch 45.  
anti-EpCam, used for IHC, Abcam, ref.#ab71916, batch GR3266477-1.

Validation

Every antibodies used are validated for species and applications on manufacturer's website.

## Eukaryotic cell lines

Policy information about [cell lines](#)

|                          |                                                                                                                                                                                       |
|--------------------------|---------------------------------------------------------------------------------------------------------------------------------------------------------------------------------------|
| Cell line source(s)      | Ishikawa cell line is from ECACC, authentication 99040201.<br>ARK1 and ARK2 cell lines were obtained from Alessandro Satin (Yale University), authentication USPC-ARK1 and USPC-ARK2. |
| Authentication           | Non of the cell lines have been authenticated after being purchased or acquired.                                                                                                      |
| Mycoplasma contamination | Cell lines are regularly tested for mycoplasma contamination. No contaminations were observed over the experimental period.                                                           |

Commonly misidentified lines  
(See [ICLAC](#) register)

To our knowledge, no commonly misidentified cell lines were used in this study.

## Palaeontology and Archaeology

Specimen provenance

Provide provenance information for specimens and describe permits that were obtained for the work (including the name of the issuing authority, the date of issue, and any identifying information). Permits should encompass collection and, where applicable, export.

Specimen deposition

Indicate where the specimens have been deposited to permit free access by other researchers.

Dating methods

If new dates are provided, describe how they were obtained (e.g. collection, storage, sample pretreatment and measurement), where they were obtained (i.e. lab name), the calibration program and the protocol for quality assurance OR state that no new dates are provided.

Tick this box to confirm that the raw and calibrated dates are available in the paper or in Supplementary Information.

Ethics oversight

Identify the organization(s) that approved or provided guidance on the study protocol, OR state that no ethical approval or guidance was required and explain why not.

Note that full information on the approval of the study protocol must also be provided in the manuscript.

## Animals and other organisms

Policy information about [studies involving animals](#); [ARRIVE guidelines](#) recommended for reporting animal research

Laboratory animals

For PTEN experiments, mice were C57b6 injected with tamoxifen at weeks old and maintained in facility for 6-7 additional weeks before being sacrificed. For xenograft experiments, 7 weeks old BalbC Nude mice were injected with Ishikawa cell line and sacrificed 1 month later.

Wild animals

The study did not involve wild animals.

Field-collected samples

No field-collected samples were used in this paper.

Ethics oversight

Animal care and housing were in accordance with institutional European guidelines as put forth by the CECCAP local Ethical Committee (CLB\_2014\_012) for xenograft experiments and the CEEA local Ethical committee of Lleida University concerning PTEN mouse experiments.

Note that full information on the approval of the study protocol must also be provided in the manuscript.

## Human research participants

Policy information about [studies involving human research participants](#)

Population characteristics

Clinical trial : Main eligibility criteria were : adult patients suffering from histologically confirmed locally advanced / metastatic: i) Dose escalation cohorts and biological cohorts : solid tumors of any histological types, ii) extension cohort 1: endometrium or cervix carcinoma and iii) extension 2: endometrial carcinoma and who positively expressed Hormone Receptors (with a positivity threshold value  $\geq 10\%$ ); with documented disease progression after at least one prior line of treatment in the metastatic/advanced setting; RECIST V1.1 evaluable disease, for extension cohorts: at least one lesion with a diameter  $\geq 10$  mm, visible by medical imaging and accessible to percutaneous sampling, signed informed consent, willingness to use adequate contraception method.

Recruitment

The recruitment is closed. In the dose escalation part : 42 patients were enrolled (n=19 patients were enrolled in 7 dose level cohorts + 23 in biological collection cohorts). In each extension cohort : 14 patients were enrolled. Patients were enrolled in 3 comprehensive cancer center in France (Centre Léon, Bérard, IUCT-Oncopole Toulouse and Institut de Cancérologie de l'Ouest).

Ethics oversight

The protocol, its amendment and informed consent form were approved by an Ethical committee (Comité de Protection des Personnes SUD-EST IV). The clinical trial NP137 was conducted in accordance with the principles laid down by the 18th World Medical Assembly (Helsinki, 1964) and all applicable amendments laid down by the World Medical Assemblies and the ICH guidelines E6 (R2) for Good Clinical Practice (GCP). This Clinical Trial was conducted in compliance with the French and European laws and regulations in force, including GDPR.

For the cohort of 72 human endometrial tumors : All experiments were performed in accordance with relevant guidelines and regulations. Research involving these human samples must have been performed in accordance with the WMA Declaration of Helsinki.

Note that full information on the approval of the study protocol must also be provided in the manuscript.

## Clinical data

Policy information about [clinical studies](#)

All manuscripts should comply with the ICMJE [guidelines for publication of clinical research](#) and a completed [CONSORT checklist](#) must be included with all submissions.

|                             |                                                                                                                                                                                                                                                                                                                                                                                                                                                                                                                                                                                                                                                                                                                                                                                                                                                                                                                        |
|-----------------------------|------------------------------------------------------------------------------------------------------------------------------------------------------------------------------------------------------------------------------------------------------------------------------------------------------------------------------------------------------------------------------------------------------------------------------------------------------------------------------------------------------------------------------------------------------------------------------------------------------------------------------------------------------------------------------------------------------------------------------------------------------------------------------------------------------------------------------------------------------------------------------------------------------------------------|
| Clinical trial registration | ClinicalTrials.gov Identifier:NCT02977195                                                                                                                                                                                                                                                                                                                                                                                                                                                                                                                                                                                                                                                                                                                                                                                                                                                                              |
| Study protocol              | A summary of the protocol is available at <a href="https://clinicaltrials.gov/ct2/show/NCT02977195?term=NP137&amp;draw=2&amp;rank=1">https://clinicaltrials.gov/ct2/show/NCT02977195?term=NP137&amp;draw=2&amp;rank=1</a>                                                                                                                                                                                                                                                                                                                                                                                                                                                                                                                                                                                                                                                                                              |
| Data collection             | Clinical data were collected into dedicated eCRF (ENNOV Clinical) and fully monitored on site for all enrolled patients. Database lock for dose escalation and biological cohorts was done on 16/07/2019 and for extension 01 on 25 March 2020. Extension 02 is not yet analysed (database lock planned by June 2021)                                                                                                                                                                                                                                                                                                                                                                                                                                                                                                                                                                                                  |
| Outcomes                    | <p>PRIMARY OUTCOME</p> <ul style="list-style-type: none"> <li>- Dose escalation part : Dose limiting toxicities over the first 28d of treatment.</li> <li>- Extension Part: Objective response rate after 3 months (ORR3m) defined as the rate of patients with CR or PR as per RECIST 1.1 after 3 months of treatment.</li> </ul> <p>SECONDARY OUTCOMES: Safety graded according to NCI-CTCAE, Version 4.03; Overall response Rate (ORR) according to RECIST V1.1; duration of response, progression-free survival; NP137 pharmacokinetic parameters ( C<sub>max</sub> ; t<sub>max</sub> ; AUC<sub>t</sub> ; AUC<sub>∞</sub> and t<sub>1/2</sub>); PFS2/PFS1 (for expansion part only) defined as the ratio of the PFS of the current treatment (PFS2) versus the PFS of previous treatment before inclusion (PFS1); Tumor Growth Kinetics by comparing post-treatment scans with at least 2 pre-treatment scans.</p> |

## Dual use research of concern

Policy information about [dual use research of concern](#)

### Hazards

Could the accidental, deliberate or reckless misuse of agents or technologies generated in the work, or the application of information presented in the manuscript, pose a threat to:

- | No                                  | Yes                      |                            |
|-------------------------------------|--------------------------|----------------------------|
| <input checked="" type="checkbox"/> | <input type="checkbox"/> | Public health              |
| <input checked="" type="checkbox"/> | <input type="checkbox"/> | National security          |
| <input checked="" type="checkbox"/> | <input type="checkbox"/> | Crops and/or livestock     |
| <input checked="" type="checkbox"/> | <input type="checkbox"/> | Ecosystems                 |
| <input checked="" type="checkbox"/> | <input type="checkbox"/> | Any other significant area |

### Experiments of concern

Does the work involve any of these experiments of concern:

- | No                                  | Yes                      |                                                                             |
|-------------------------------------|--------------------------|-----------------------------------------------------------------------------|
| <input checked="" type="checkbox"/> | <input type="checkbox"/> | Demonstrate how to render a vaccine ineffective                             |
| <input checked="" type="checkbox"/> | <input type="checkbox"/> | Confer resistance to therapeutically useful antibiotics or antiviral agents |
| <input checked="" type="checkbox"/> | <input type="checkbox"/> | Enhance the virulence of a pathogen or render a nonpathogen virulent        |
| <input checked="" type="checkbox"/> | <input type="checkbox"/> | Increase transmissibility of a pathogen                                     |
| <input checked="" type="checkbox"/> | <input type="checkbox"/> | Alter the host range of a pathogen                                          |
| <input checked="" type="checkbox"/> | <input type="checkbox"/> | Enable evasion of diagnostic/detection modalities                           |
| <input checked="" type="checkbox"/> | <input type="checkbox"/> | Enable the weaponization of a biological agent or toxin                     |
| <input checked="" type="checkbox"/> | <input type="checkbox"/> | Any other potentially harmful combination of experiments and agents         |

## ChIP-seq

### Data deposition

- Confirm that both raw and final processed data have been deposited in a public database such as [GEO](#).
- Confirm that you have deposited or provided access to graph files (e.g. BED files) for the called peaks.

#### Data access links

May remain private before publication.

For "Initial submission" or "Revised version" documents, provide reviewer access links. For your "Final submission" document, provide a link to the deposited data.

#### Files in database submission

Provide a list of all files available in the database submission.

Genome browser session  
(e.g. [UCSC](#))

Provide a link to an anonymized genome browser session for "Initial submission" and "Revised version" documents only, to enable peer review. Write "no longer applicable" for "Final submission" documents.

## Methodology

Replicates

Describe the experimental replicates, specifying number, type and replicate agreement.

Sequencing depth

Describe the sequencing depth for each experiment, providing the total number of reads, uniquely mapped reads, length of reads and whether they were paired- or single-end.

Antibodies

Describe the antibodies used for the ChIP-seq experiments; as applicable, provide supplier name, catalog number, clone name, and lot number.

Peak calling parameters

Specify the command line program and parameters used for read mapping and peak calling, including the ChIP, control and index files used.

Data quality

Describe the methods used to ensure data quality in full detail, including how many peaks are at FDR 5% and above 5-fold enrichment.

Software

Describe the software used to collect and analyze the ChIP-seq data. For custom code that has been deposited into a community repository, provide accession details.

## Flow Cytometry

### Plots

Confirm that:

- The axis labels state the marker and fluorochrome used (e.g. CD4-FITC).
- The axis scales are clearly visible. Include numbers along axes only for bottom left plot of group (a 'group' is an analysis of identical markers).
- All plots are contour plots with outliers or pseudocolor plots.
- A numerical value for number of cells or percentage (with statistics) is provided.

### Methodology

Sample preparation

Describe the sample preparation, detailing the biological source of the cells and any tissue processing steps used.

Instrument

Identify the instrument used for data collection, specifying make and model number.

Software

Describe the software used to collect and analyze the flow cytometry data. For custom code that has been deposited into a community repository, provide accession details.

Cell population abundance

Describe the abundance of the relevant cell populations within post-sort fractions, providing details on the purity of the samples and how it was determined.

Gating strategy

Describe the gating strategy used for all relevant experiments, specifying the preliminary FSC/SSC gates of the starting cell population, indicating where boundaries between "positive" and "negative" staining cell populations are defined.

- Tick this box to confirm that a figure exemplifying the gating strategy is provided in the Supplementary Information.

## Magnetic resonance imaging

### Experimental design

Design type

Indicate task or resting state; event-related or block design.

Design specifications

Specify the number of blocks, trials or experimental units per session and/or subject, and specify the length of each trial or block (if trials are blocked) and interval between trials.

Behavioral performance measures

State number and/or type of variables recorded (e.g. correct button press, response time) and what statistics were used to establish that the subjects were performing the task as expected (e.g. mean, range, and/or standard deviation across subjects).

## Acquisition

Imaging type(s)

Field strength

Sequence & imaging parameters

Area of acquisition

Diffusion MRI  Used  Not used

## Preprocessing

Preprocessing software

Normalization

Normalization template

Noise and artifact removal

Volume censoring

## Statistical modeling & inference

Model type and settings

Effect(s) tested

Specify type of analysis:  Whole brain  ROI-based  Both

Statistic type for inference (See [Eklund et al. 2016](#))

Correction

## Models & analysis

n/a | Involved in the study

Functional and/or effective connectivity

Graph analysis

Multivariate modeling or predictive analysis

Functional and/or effective connectivity

Graph analysis

Multivariate modeling and predictive analysis
